# Supplementary material for: Tightly connected MnO2–graphene with tunable energy density and power density for supercapacitor applications
Source: Royal Society of Chemistry journal article supplement (doi:10.1039/c2jm16707g), 2012-01-01
Supplement: c2jm16707g.pdf [file c2jm16707g.pdf]

# Tightly Connected MnO<sub>2</sub>-Graphene with Tunable Energy Density and Power Density for Supercapacitor Applications

Chih-Yao Chen<sup>1</sup>, Chen-Yen Fan<sup>1</sup>, Ming-Tsung Lee<sup>1</sup>, Jeng-Kuei Chang<sup>1,2,3\*</sup>

<sup>1</sup> Institute of Materials Science and Engineering,

<sup>2</sup> Department of Chemical and Materials Engineering,

<sup>3</sup> Department of Mechanical Engineering,

National Central University, Taoyuan, Taiwan

E-mail: [jkchang@ncu.edu.tw](mailto:jkchang@ncu.edu.tw); Fax: +886-3-2805034

## **Materials synthesis and characterization**

All chemicals used in this study are of analytical grade, and used without further purification. Natural graphite powder (Alfa Aesar; with a particle size of ~70 μm and a purity of 99.999 %) was oxidized using a modified Staudenmaier method to produce graphite oxide (GO). Briefly, the graphite (5 g) was continuously stirred in a mixed solution of sulfuric acid (88 mL), nitric acid (45 mL), and potassium chlorate (55 g) for approximately 100 hours. Afterwards, the resulting GO was rinsed with 5% HCl aqueous solution and then repeatedly washed with deionized water until the pH of the filtrate was neutral. The product was dried and pulverized. Finally, GO was rapidly heated (~30 °C/min.) to 1050 °C in an inert Ar atmosphere and cooled in the furnace. After the thermal exfoliation and reduction, graphene was produced.

MnO<sub>2</sub>/graphene nanocomposites were synthesized using an ethanol-assisted graphene-sacrifice reduction method. KMnO<sub>4</sub> was used as the precursor, which was

reduced by graphene and ethanol to form  $\text{MnO}_2$ . In one pot, 0.1 M  $\text{KMnO}_4$  was dissolved in 0.2 M KOH aqueous solution (20 mL). In the other pot, graphene was dispersed (with ultrasonication) in ethanol and water mixed solution (20 mL/10 mL). After combination of the two pots, a vigorously stir continued for 3 h to ensure the completeness of the reduction reaction. The resulting precipitates were separated by centrifugation followed by thoroughly washing with deionized water. All the samples were dried overnight at 80 °C prior to analyses. A plain  $\text{MnO}_2$  sample (without graphene incorporation) was also prepared for comparison.

Microstructure of the samples was examined using scanning electron microscopy (SEM, JEOL JSM-7000F) and transmission electron microscopy (TEM, FEI Tecnai F20 G2). The crystallinity was determined with an X-ray diffractometer (XRD, Rigaku MiniFlex II) with a Cu target.

Electrochemical characterizations were performed using cyclic voltammetry (CV) and chronopotentiometry (CP) in 3 M KCl aqueous solution at 25 °C. The applied potential and current were regulated with a potentiostat (Autolab, 302N). The synthesized powder was mixed with isopropyl alcohol and Nafion and then pasted on a glassy carbon disc to prepare the working electrode. A platinum wire and an Ag/AgCl (in 3 M KCl solution) electrode were used as the reference and counter electrodes, respectively.

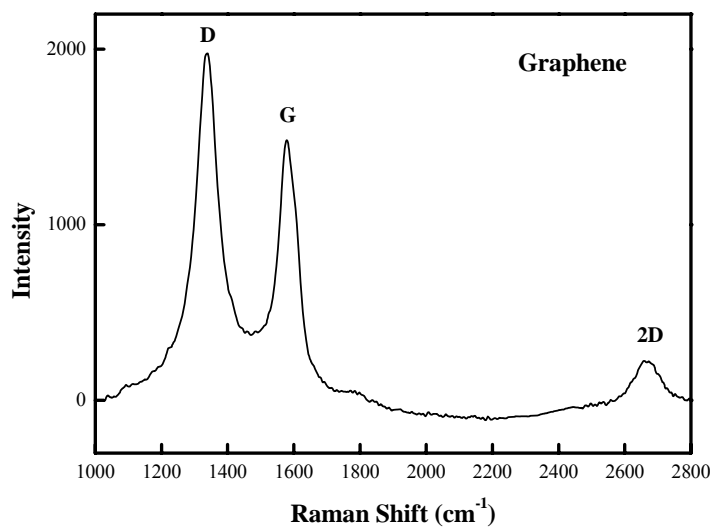

Fig. SI1. Raman spectrum of the graphene prepared.

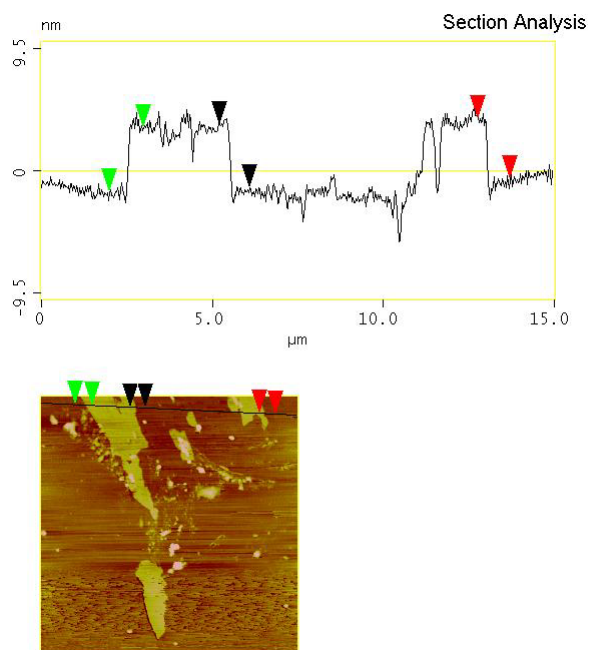

Fig. SI2. AFM analysis of the graphene prepared.

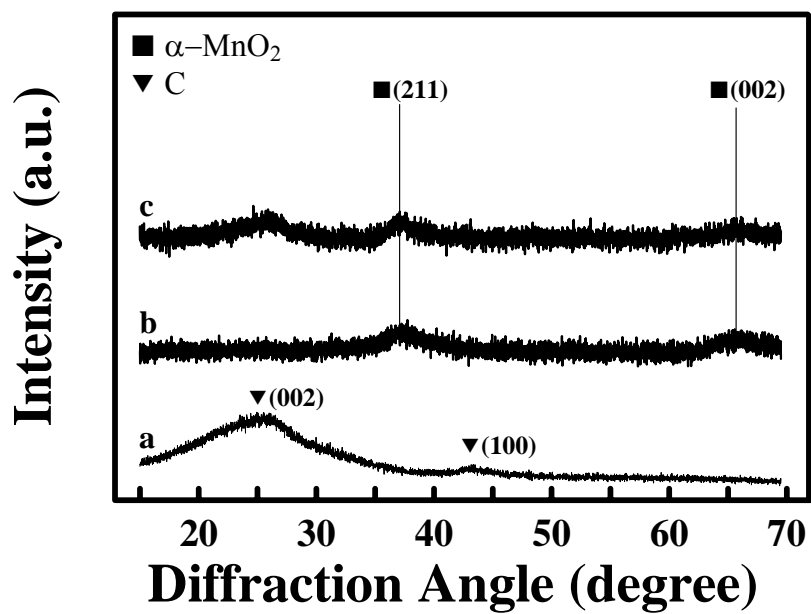

Fig. SI3. X-ray diffraction patterns of pristine graphene (curve a), plain MnO<sub>2</sub> (curve b), and the MnO<sub>2</sub>/GNS-90/10 nanocomposite (curve c).

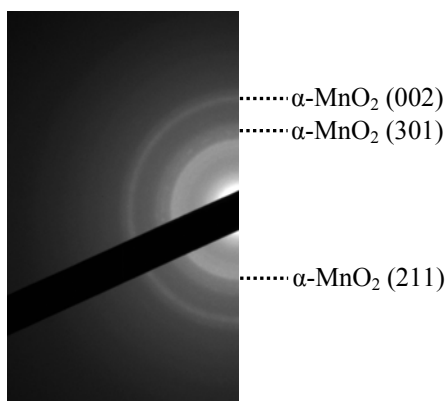

Fig. SI4. Electron diffraction pattern of the MnO<sub>2</sub>/GNS-90/10 nanocomposite.

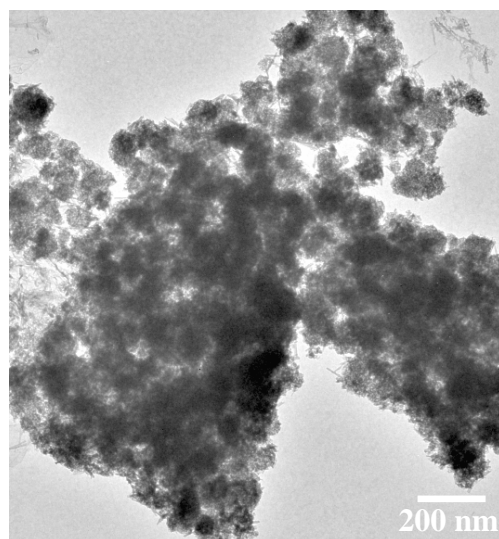

Fig. SI5. TEM image of the MnO<sub>2</sub>/GNS-90/10 nanocomposite.

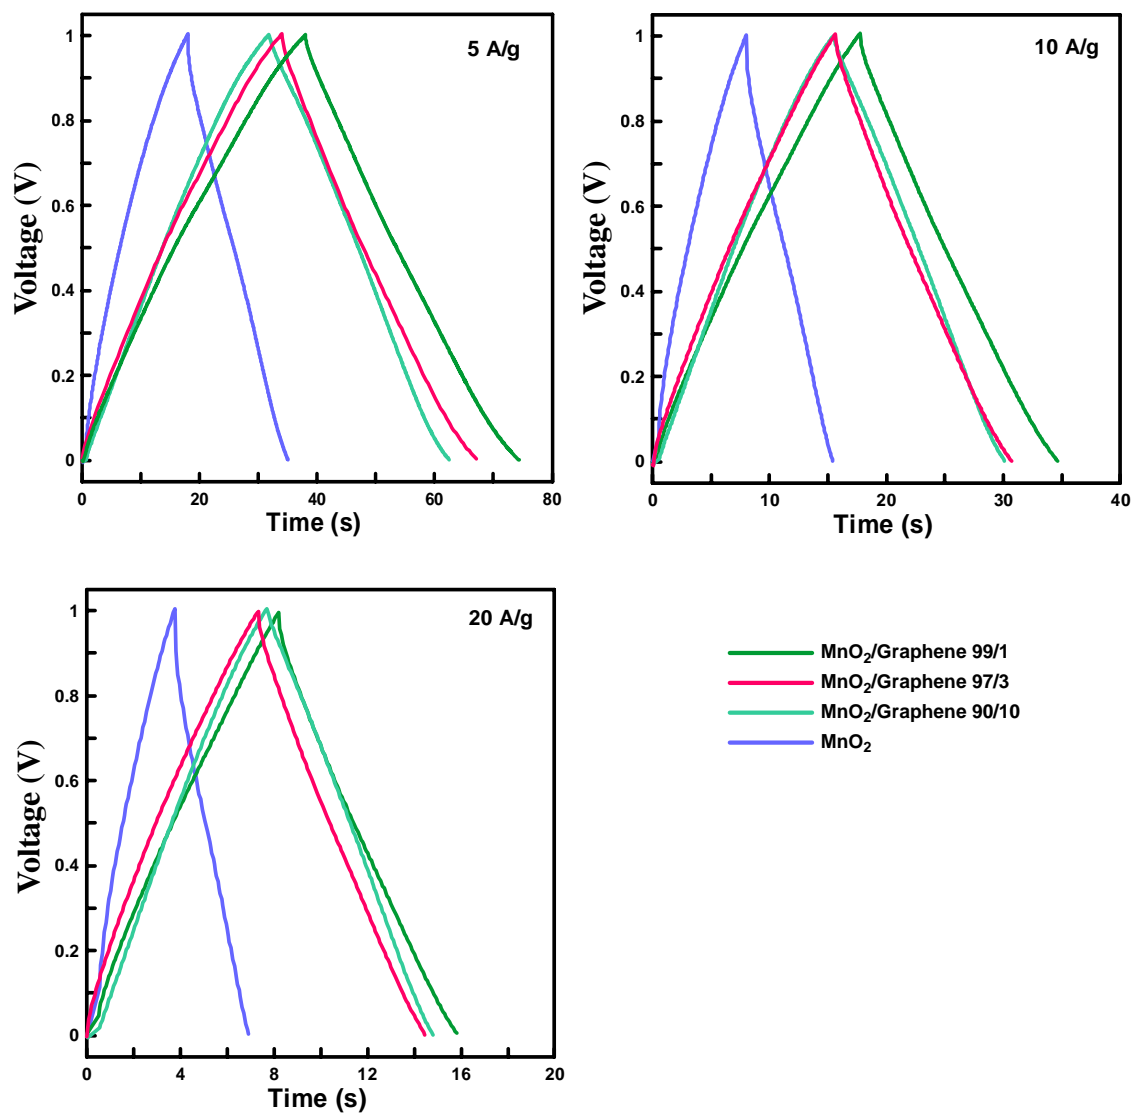

Fig. SI6. Galvanic charge/discharge curves measured on a two-electrode configuration at various applied current densities.
